# Supplementary material
Source: PubMed Central journal article supplement (PMC3567838)
Supplement: NIHMS51415-supplement-Supplementary_Data.pdf [file NIHMS51415-supplement-Supplementary_Data.pdf]

# Supplementary Information

## **JAK/STAT3 signalling is sufficient and dominant over antagonistic cues for the establishment of naïve pluripotency**

Anouk L. van Oosten<sup>1,2</sup>, Yael Costa<sup>1</sup>, Austin Smith<sup>1,2</sup> & Jose C.R. Silva<sup>1,2,\*</sup>

<sup>1</sup>Wellcome Trust Centre for Stem Cell Research, Stem Cell Institute and <sup>2</sup>Department of Biochemistry, University of Cambridge, Tennis court road, Cambridge, CB2 1QR, UK

\*Correspondence: José C.R. Silva

jcs64@cscr.cam.ac.uk

+ 44 (0)1223 760208

### **Supplementary Information includes:**

Supplementary Figures S1-S4

Supplementary Tables S1-S3

## Supplementary Figures

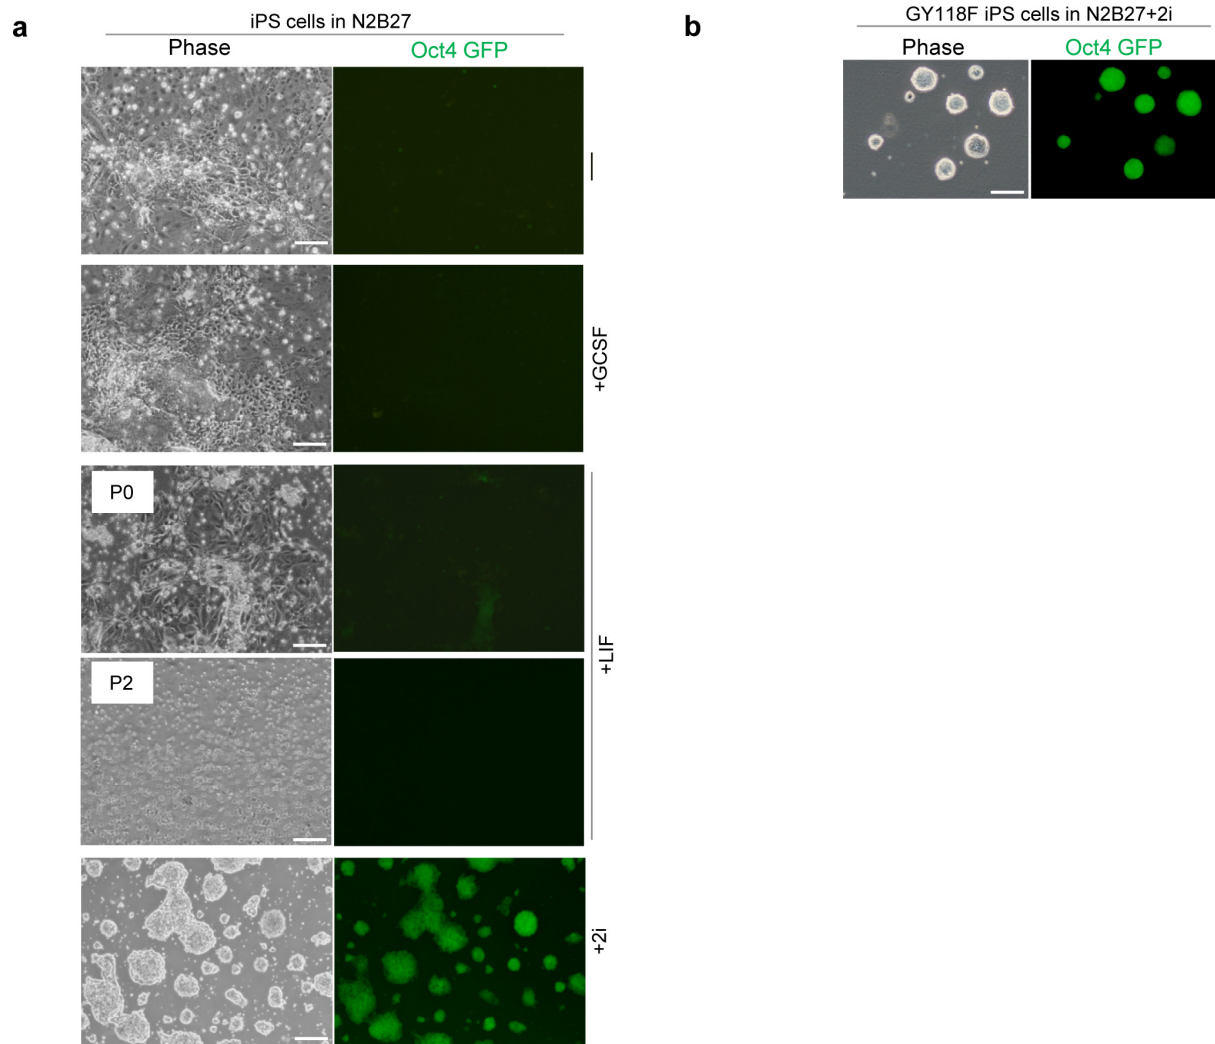

### Supplementary Figure S1 N2B27 plus GCSF or LIF does not support self-renewal of pluripotent cells

(a) Phase and fluorescent images of wild type (WT) iPS cells after medium switch to N2B27 supplemented with either GCSF or LIF. N2B27 plus 2i was used as a control culture condition that supports self-renewal. White bars correspond to 119.4  $\mu\text{m}$ . (b) Phase and fluorescent images of GY118F iPS cells derived and maintained in N2B27 plus GCSF switched to 2i culture conditions. White bars correspond to 161.4  $\mu\text{m}$ .

**a**

| Gene         |                             |
|--------------|-----------------------------|
| Serpina3h    | N.V.                        |
| Tcfap2c      | pattern confirmed p=0.001   |
| LOC381140    | N.V.                        |
| LOC100047268 | N.V.                        |
| Ier5l        | pattern confirmed p=0.05    |
| Sbno2        | trend not confirmed         |
| Gadd45g      | pattern confirmed p=0.002   |
| Gadd45b      | trend not confirmed         |
| Fzd5         | pattern confirmed p=0.1     |
| Gpr146       | upregulated upon readdition |
| Cish         | trend not confirmed         |

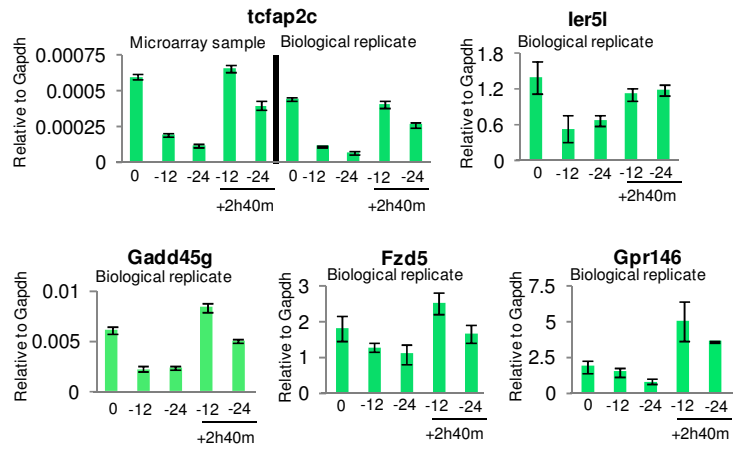

**b**

| Gene     |                          |
|----------|--------------------------|
| Wnt8a    | trend                    |
| Prickle1 | trend not confirmed      |
| Tal2     | trend                    |
| Nodal    | pattern confirmed p=0.05 |

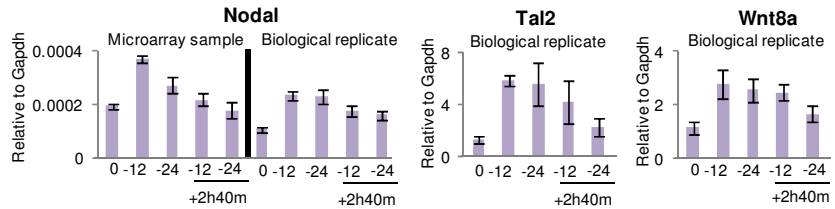

**c**

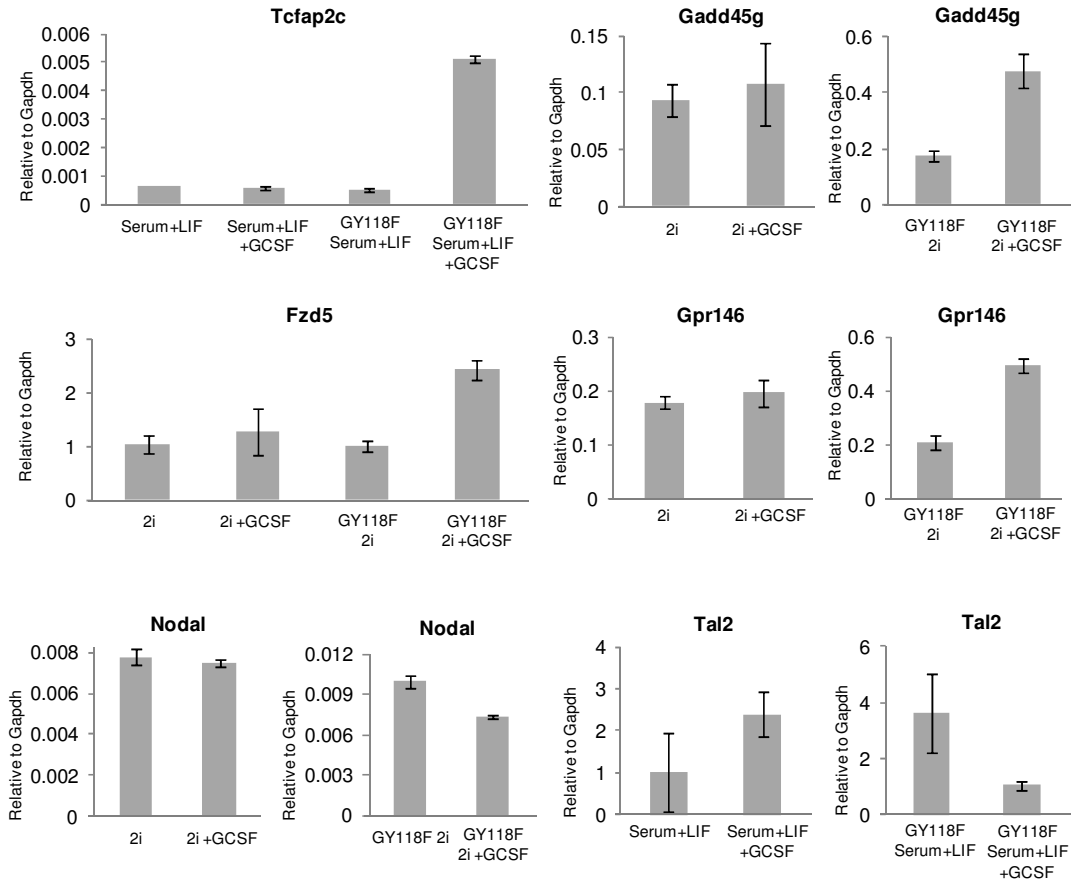

## **Supplementary Figure S2 GCSF induced transcriptional activity is mediated by GY118F**

(a) List of genes not previously reported as LIF/STAT3 targets that were found to be downregulated upon GCSF withdrawal and upregulated upon its re-addition ( $\geq 1.4$  fold change threshold). The cells in green represent array hits that have been validated by qRT-PCR in a biological replicate as depicted by respective graphs. Significance has been determined by T testing. Array hits in white cells have not been verified (N.V.). Array hits in red cells did not have pattern validated by qRT-PCR. Error bars indicate  $\pm 1$  standard deviation (s.d.) (n=3). (b) List of genes that were found to be upregulated upon GCSF withdrawal and that were downregulated upon readdition of GCSF ( $\geq 1.4$  fold change threshold). The cells in purple correspond to array hits for which gene expression trend was confirmed by qRT-PCR in a biological replicate as depicted by respective graphs. Where significance is stated this has been determined by T-testing. Prickle1 did not show array pattern by qRT-PCR for a biological replicate. Error bars indicate  $\pm 1$  s.d. (n=3). (c) As pluripotent cells cannot self-renew in N2B27 only we could not control for putative GCSF mediated responses independent of the GY118F transgene in this culture condition. To address this we analysed the response of ES cells to GCSF stimulation in 2i or serum plus LIF culture conditions. ES cell lines transfected with the GY118F or control vector transgene were subjected to GCSF stimulation for 2 hours and 40 minutes. Results show that response to GCSF for Tcfap2c, Gadd45g, Fzd5, Gpr146, Nodal and Tal2 is mediated by GY118F. No conclusive response to GCSF stimulation was observed for Ier5l and Wnt8a suggesting that this may be specific to the N2B27 only. Error bars indicate  $\pm 1$  s.d. (n=3). The GCSF receptor is not expressed in iPS cells.

Putative binding as predicted from consideration of publicly available ChIP-seq data

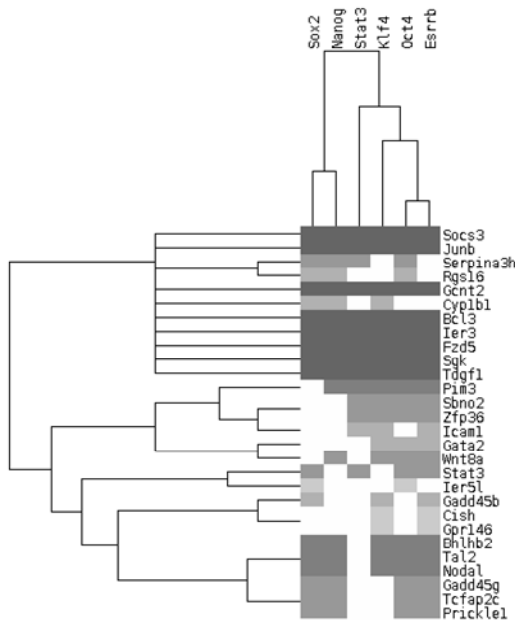

Potential GY118F downstream targets identified in iPSCs

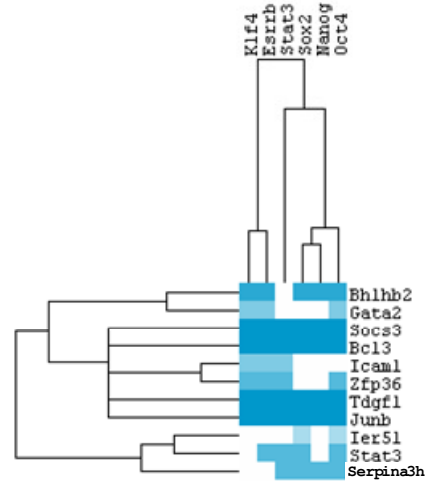

Genes positively regulated by GY118F common to iPSCs and EpiSCs

### Supplementary Figure S3 STAT3 and pluripotency transcription factor binding to putative GY118F downstream targets

Consideration of publicly available ChIP-seq data to predict putative binding of candidate GY118F downstream targets by STAT3 and pluripotency transcription factor Oct4, Sox2, Nanog, Klf4 and Esrrb. Transcription factor binding profiles of the genes were clustered using the Pearson correlation coefficient as a metric and complete linkage clustering. Gray or blue shading represents the fraction of all considered transcription factors that bind to the gene.

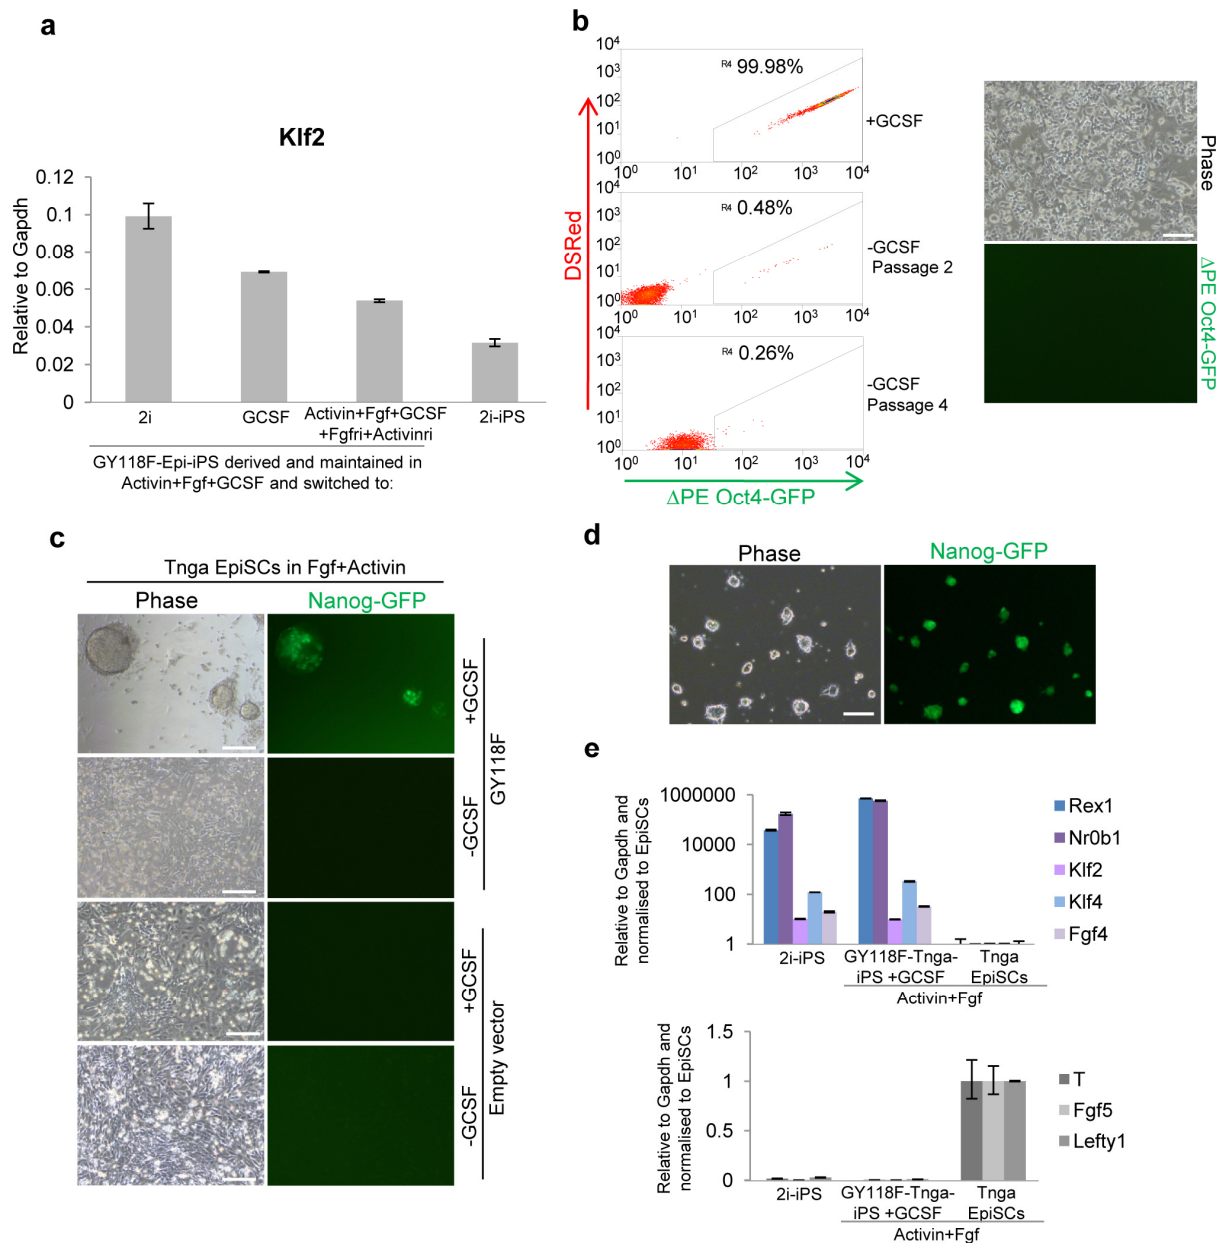

**Supplementary Figure S4 GY118F induces naïve pluripotency despite a culture environment that instructs and maintains a primed state**

(a) GY118F iPS cells derived and maintained in Activin plus Fgf plus GCSF cultured in N2B27 plus 2i, N2B27 plus GCSF or in the presence of inhibitors for Activin and Fgf signalling maintain pluripotency as confirmed by the continued expressing of Klf2. Error bars indicate  $\pm 1$  s.d. (n=3). (b) Flow cytometry analysis and phase and fluorescent images showing loss of  $\Delta$ PE-Oct4 GFP expression for GY118F iPS cells that were passaged in

N2B27 plus Activin plus FGF in the absence of GCSF. The white bar corresponds to 129 $\mu$ m. (c) Phase and fluorescent images showing the emergence of Nanog-GFP positive colonies from GY118F-tnga EpiSCs cultured in N2B27 plus Activin plus FGF plus GCSF. White bars correspond to 161.4 $\mu$ m. (d) Nanog-GFP positive cells isolated and maintained in EpiSC culture conditions supplemented with GCSF. (e) qRT-PCR analysis for naïve pluripotency and EpiSC marker genes. Gene expression and associated error bars representing s.d. (n=3) were normalised to EpiSCs. The white bar corresponds to 129 $\mu$ m.

Supplementary Table S1 Applied Biosystems taqman probes:

| Gene name: | Probe ID:     |
|------------|---------------|
| GAPD       | 4352339E      |
| mSocs3     | Mm01249143_g1 |
| FGF4       | Mm00438917_m1 |
| Nr0b1      | Mm00431729_m1 |
| Nanog      | Mm02384862_g1 |
| Rex1       | Mm03053975_g1 |
| Klf4       | Mm00516104_m1 |
| Klf2       | Mm01244979_g1 |
| FGF5       | Mm00438919_m1 |
| Lefty1     | Mm00438615_m1 |
| Lefty2     | Mm00774547_m1 |
| T          | Mm01318252_m1 |
| Tcfap2c    | Mm00493473_m1 |
| Nodal      | Mm00443040_m1 |
| Gadd45g    | Mm00442225_m1 |
| Gadd45b    | Mm00435123_m1 |

Supplementary Table S2 Applied Biosystems custom taqman probes:

| Name:                  | Sequence:                    |
|------------------------|------------------------------|
| Retroviral Oct4-F      | TGGTACGGGAAATCACAAGTTTGTA    |
| Retroviral Oct4-R      | GGTGAGAAGGCGAAGTCTGAAG       |
| Retroviral Oct4-probe  | FAM-CACCTTCCCCATGGCTG-MGB    |
| Retroviral Klf4-F      | TGGTACGGGAAATCACAAGTTTGTA    |
| Retroviral Klf4-R      | GAGCAGAGCGTCGCTGA            |
| Retroviral Klf4-probe  | FAM-CCCCTTCACCATGGCTG-MGB    |
| Retroviral c-Myc-F     | TGGTACGGGAAATCACAAGTTTGTA    |
| Retroviral c-Myc-R     | GGTCATAGTTCCTGTTGGTGAAGTT    |
| Retroviral c-Myc-probe | FAM-CCCTTCACCATGCCCC-MGB     |
| Retroviral Sox2-F      | TGGTACGGGAAATCACAAGTTTGTA    |
| Retroviral Sox2-R      | GCCCGGCGGCTTCA               |
| Retroviral Sox2-probe  | FAM-CTCCGTCTCCATCATGTTAT-MGB |
| Endogenous Oct4-F      | TTCCACCAGGCCCCC              |
| Endogenous Oct4-R      | GGTGAGAAGGCGAAGTCTGAAG       |
| Endogenous Oct4-probe  | FAM-CCCACCTTCCCCATGGCT-MGB   |

Supplementary Table S3 Primers used with SYBR green:

| Gene name: | Primer sequence:       |
|------------|------------------------|
| GAPD-F     | cccactaacatcaaatgggg   |
| GAPD-R     | cctccacaatgcaaagtt     |
| Stat3-F    | ggaaataacgggaaggtgct   |
| Stat3-R    | catgtcaaacgtgagcgact   |
| Ier5l-F    | catccactggcttctaccg    |
| Ier5l-R    | cgtagtggtccagggtcca    |
| Gadd45g-F  | ccgtggccaggatacagttc   |
| Gadd45g-R  | tcgttgaagctgaggctctc   |
| Fzd5-F     | cagcaggatcctccgaga     |
| Fzd5-R     | cagcactcagttccacacca   |
| Gpr146-F   | agagaaagcattcggcaaag   |
| Gpr146-R   | ccagacacacagatgaacgctc |



|            |                      |
|------------|----------------------|
| Wnt8a-F    | actgCGGctgtgacgagt   |
| Wnt8a-R    | cccgaactccacgTgtc    |
| Tal2-F     | cgctcgacagctacctt    |
| Tal2-R     | tggtcatgtccaggttcctt |
| Sbno2-F    | gggactccctccacatga   |
| Sbno2-R    | agtgcaggagtcggTtctgt |
| Cish-F     | gacatggtccttgcgtaca  |
| Cish-R     | atgcccagtgGgtaagg    |
| Prickle1-F | tgctcaggagatccaagtcc |
| Prickle1-R | ctctctcaaagtGatacgc  |
| Dusp4-F    | gtacctccagcaccaatga  |
| Dusp4-R    | gaggaaagggaggattcca  |
